# Supplementary material
Source: publisher figshare collection journal article supplement (https://frontiersin.figshare.com/ndownloader/files/13170848)

Positive control (tissue)

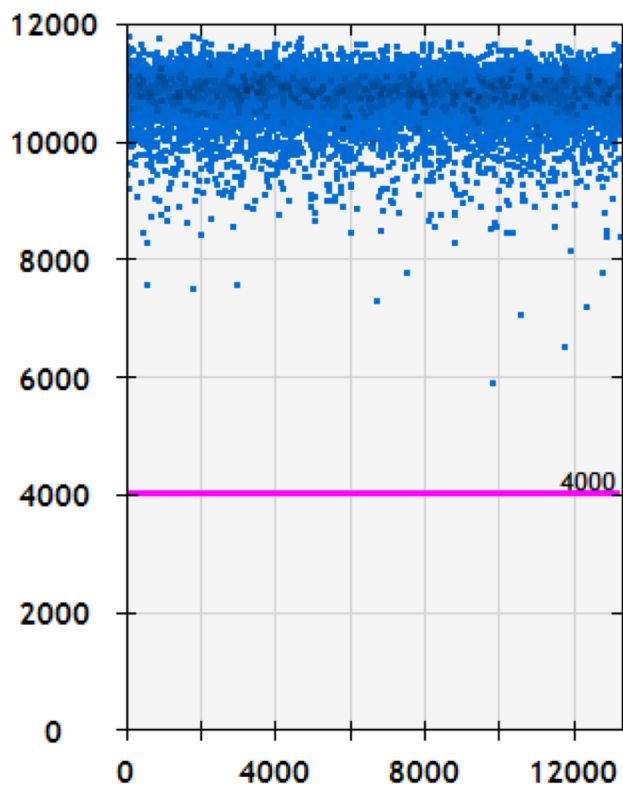

Positive field sample

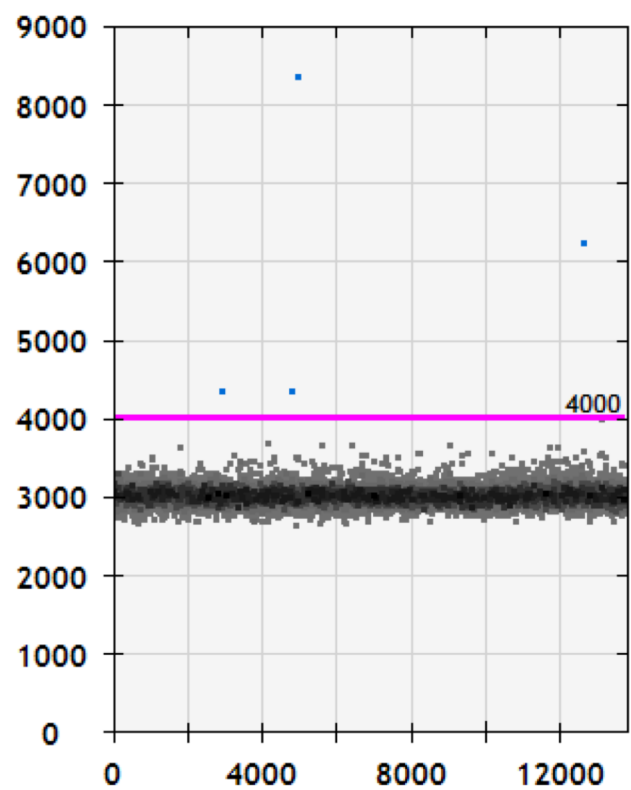

Negative control

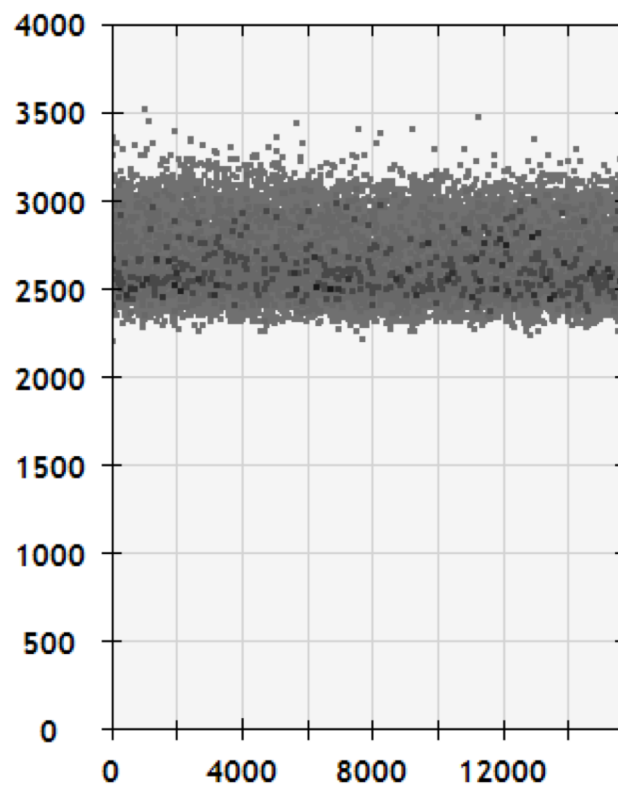

Supplement: Supplementary file 1 [file 13170848]
